# Supplementary material
Source: PubMed Central journal article supplement (PMC5860426)

SUPPLEMENTARY DATA

**Supplementary Figure 1.** Comparable age and initial blood glucose values of new-onset NOD mice enrolled into treatment groups among sites for Study 1 of combined anti-CD3 plus anti-IL-1 $\beta$  mAb treatment. Values depict the range  $\pm$  SEM of the initial age (wks) of disease onset of sites 1,2,3 (A) and the initial BGV (mg/dl) (B) of sites 1-4 of animals enrolled in the indicated treatment group amongst sites. Note that despite the considerable range of values within a given treatment group, none of the values shown for either age of onset or initial BGV are significantly different between any site.

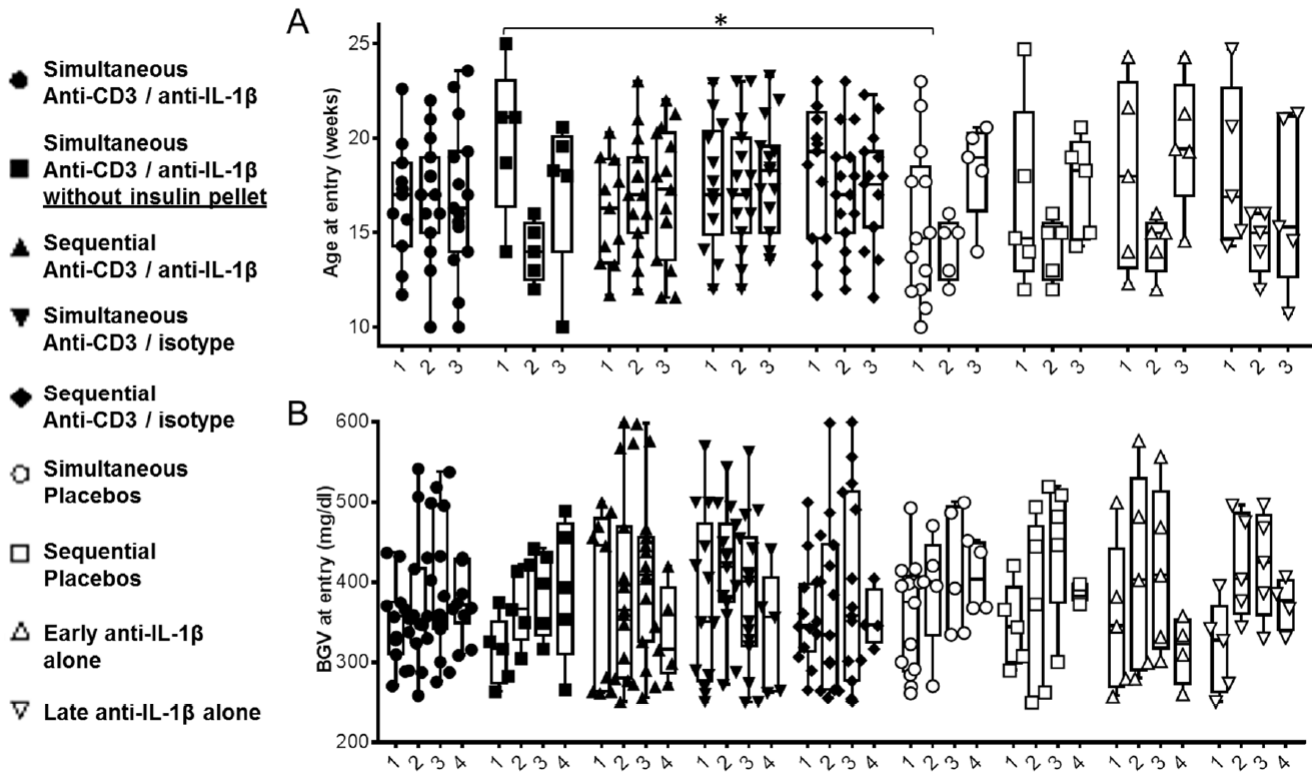

SUPPLEMENTARY DATA

**Supplementary Figure 2.** Composite data of all groups from all sites from Study 1 testing the ability of simultaneous versus sequential anti-IL-1 $\beta$  mAb therapy to improve the efficacy of anti-CD3 treatment in reversing new onset disease in NOD mice.

- Simultaneous Anti-CD3 / anti-IL-1 $\beta$  (n=51)
- Simultaneous Anti-CD3 / anti-IL-1 $\beta$  without insulin pellet (n=20)
- ▲ Sequential Anti-CD3 / anti-IL-1 $\beta$  (n=43)
- ▼ Simultaneous Anti-CD3 / isotype (n=47)
- ◆ Sequential Anti-CD3 / isotype (n=46)
- Simultaneous Placebos (n=27)
- Sequential Placebos (n=19)
- △ Early anti-IL-1 $\beta$  alone (n=18)
- ▽ Late anti-IL-1 $\beta$  alone (n=19)

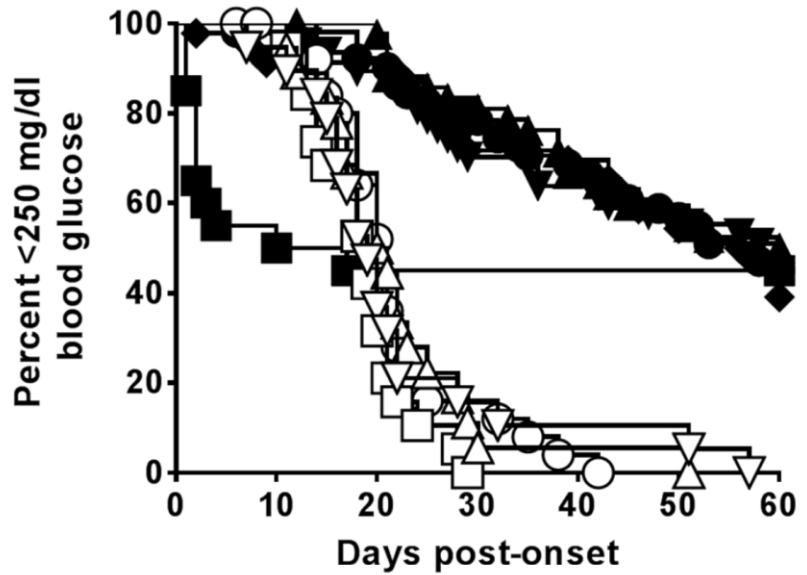

SUPPLEMENTARY DATA

**Supplementary Figure 3.** IL-1 $\beta$  blockade alone administered early (day 1, 3, 5) or late (day 5, 7, 9) after onset cannot reverse the course of type 1 diabetes. Composite results of anti-IL-1 $\beta$  mAb control given either early (solid open triangles; n = 18) or delayed (inverted open triangles; n = 19) relative to hamster F(ab)<sub>2</sub> treatment. Isotype control mAb (placebo) is given either early (open triangles; n = 27) or late (open squares; n = 19) with control hamster F(ab)<sub>2</sub>. No groups show significant disease reversal versus control insulin treatment plus control mAb alone (p = NS).

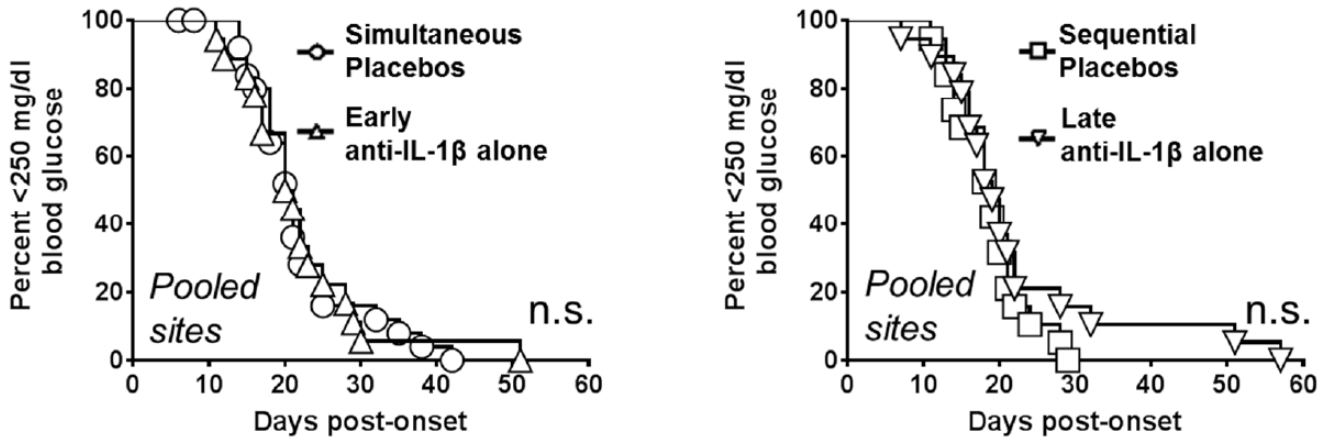

Supplement: DB150492SupplementaryData.pdf [file DB150492SupplementaryData.pdf]
